# Supplementary material
Source: MDPI journal article supplement (https://www.mdpi.com/2227-9717/9/12/2268)

## Supplementary information

**Table S1:** Time until first observation of fouling in the heat exchanger.

| Experiment            | Time until first fouling (h) | Time until clogging (h) |
|-----------------------|------------------------------|-------------------------|
| 10 min - 30% US - 9°C | 1                            | 1.5                     |
| 10 min - 30% US - 1°C | 1                            | 1.92                    |
| 16 min - 55% US - 5°C | 1.75                         | 3.67                    |
| 31 min - 80% US - 9°C | 1                            | 3.75                    |
| 31 min - 80% US - 1°C | 1.75                         | 4                       |
| 31 min - 30% US - 1°C | 2.5                          | 4                       |

**Table S2:** Parameters used for the image analysis. The algorithm and further information can be found elsewhere [26].

| Version                                          | MacroU-V69                |
|--------------------------------------------------|---------------------------|
| Scale in scale in pixels/ $\mu\text{m}$          | 0.650                     |
| Background image method                          | Median of multiple frames |
| Edge detection High Threshold                    | 3                         |
| Edge detection Low Threshold                     | 1                         |
| Edge detection Smoothing                         | 2                         |
| Edge detection Sharpening                        | 0.4                       |
| Frames for background subtraction                | 30                        |
| Use additional histogram based binerization      | true                      |
| Closing cycles when using histogram binerization | 0                         |
| Closing cycles after edge detection              | 2                         |
| Field of View correction factor                  | true                      |
| Minimum size                                     | 1                         |
| Minimum circularity                              | 0                         |
| Maximum circularity                              | 1                         |
| Watershed irregular features                     | true                      |
| Erosion cycles                                   | 3                         |
| Convexity threshold                              | 1                         |

Figure S1: Picture of the setup.

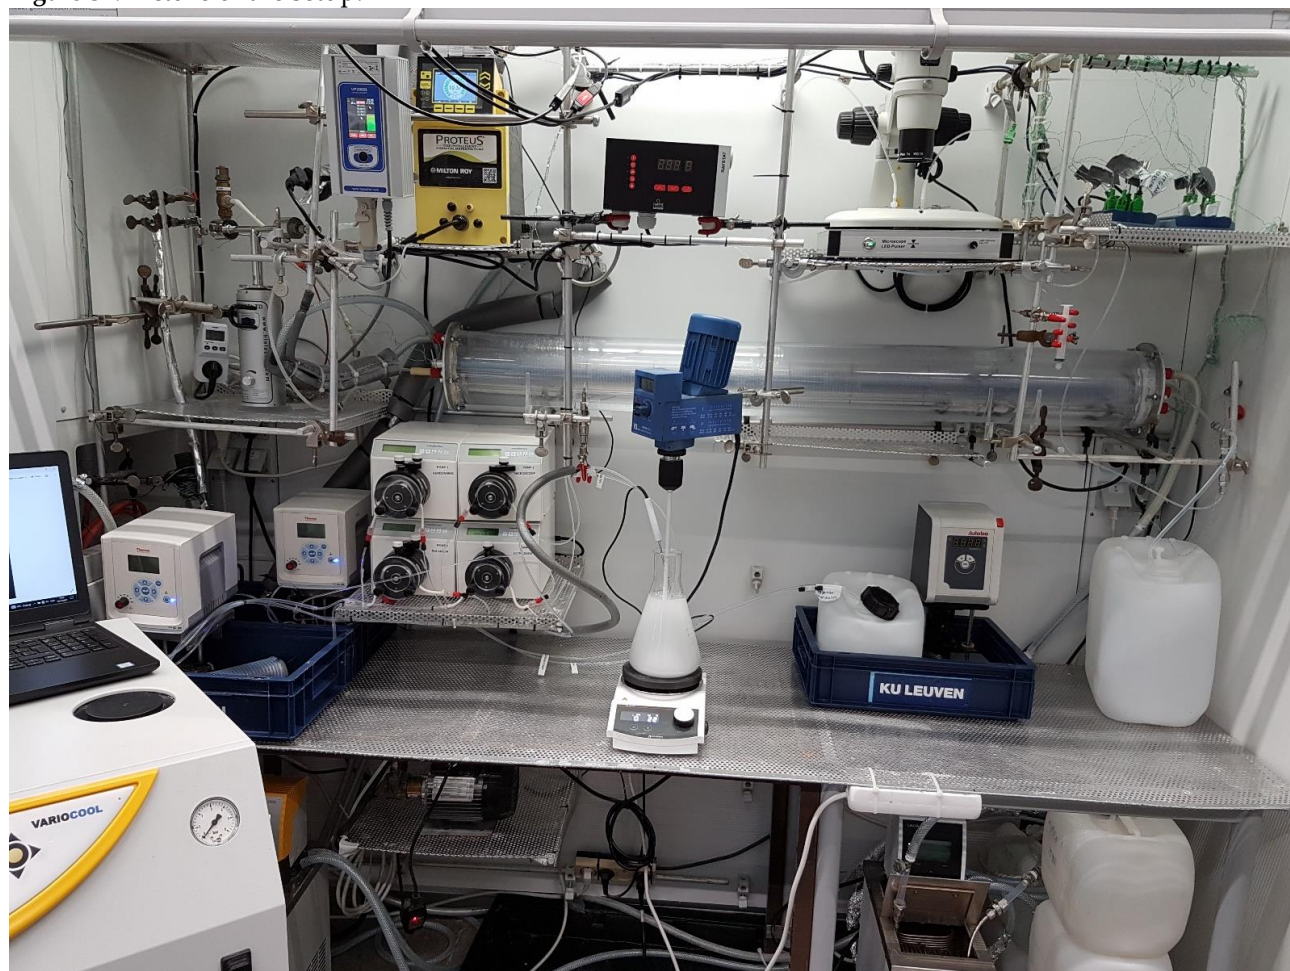

Supplement: s1 [file s1]
